1 **Whole blood immunophenotyping uncovers immature neutrophil-to-VD2 T-cell**  
2 **ratio as an early prognostic marker for severe COVID-19**

3

4 Guillaume Carissimo<sup>1†</sup>, Weili Xu<sup>1†</sup>, Immanuel Kwok<sup>1†</sup>, Mohammad Yazid Abdad<sup>2</sup>, Yi-  
5 Hao Chan<sup>1</sup>, Siew-Wai Fong<sup>1,3</sup>, Kia Joo Puan<sup>1</sup>, Cheryl Yi-Pin Lee<sup>1</sup>, Nicholas Kim-Wah  
6 Yeo<sup>1</sup>, Siti Naqiah Amrun<sup>1</sup>, Rhonda Sin-Ling Chee<sup>1</sup>, Wilson How<sup>1</sup>, Stephrene Chan<sup>4</sup>,  
7 Eugene Bingwen Fan<sup>4</sup>, Anand Kumar Andiappan<sup>1</sup>, Bernett Lee<sup>1</sup>, Olaf Röttschke<sup>1</sup>,  
8 Barnaby Edward Young<sup>2,5,6</sup>, Yee-Sin Leo<sup>2,5,6,7</sup>, David C. Lye<sup>2,5,6,7</sup>, Laurent Renia<sup>1</sup>, Lai  
9 Guan Ng<sup>1</sup>, Anis Larbi<sup>1</sup>, Lisa F.P. Ng<sup>1,8,9\*</sup>

10

11 1. Singapore Immunology Network, Agency for Science, Technology and  
12 Research, Immunos, Biopolis, 138648, Singapore

13 2. National Centre for Infectious Diseases, 16 Jalan Tan Tock Seng, 308442,  
14 Singapore

15 3. Department of Biological Sciences, National University of Singapore,  
16 Singapore 117543

17 4. Department of Haematology, Tan Tock Seng Hospital, 11 Jalan Tan Tock  
18 Seng, 308433, Singapore

19 5. Department of Infectious Diseases, Tan Tock Seng Hospital, 11 Jalan Tan  
20 Tock Seng, 308433, Singapore

21 6. Lee Kong Chian School of Medicine, Nanyang Technological University, 11  
22 Mandalay Road, 308232, Singapore

23 7. Yong Loo Lin School of Medicine, National University of Singapore and  
24 National University Health System, 10 Medical Drive, 117597, Singapore

25 8. Department of Biochemistry, Yong Loo Lin School of Medicine, National  
26 University of Singapore, 8 Medical Drive, 117596, Singapore

27 9. Institute of Infection, Veterinary and Ecological Sciences, University of  
28 Liverpool, Liverpool, 8 West Derby Street, Liverpool L7 3EA, United Kingdom

29 † contributed equally to this work

30

31 **Keywords:**

32 COVID-19, SARS-CoV-2, flow cytometry, immunophenotyping, monocytes,  
33 neutrophils, lymphocytes, gamma delta T-cells, cytokine, patients whole blood  
34 phenotyping

35

36 **\*Corresponding author:** Lisa F.P. Ng: Laboratory of Microbial Immunity, Singapore  
37 Immunology Network, A\*STAR, 8A Biomedical Grove, Immunos #04-06, Singapore  
38 138648. Phone: (+65)-64070028. Email: [lisa\\_ng@immunol.a-star.edu.sg](mailto:lisa_ng@immunol.a-star.edu.sg)

39 **Abstract**

40 SARS-CoV-2 is the novel coronavirus responsible for the current COVID-19  
41 pandemic. Severe complications are observed only in a small proportion of infected  
42 patients but the cellular mechanisms underlying this progression are still unknown.  
43 Comprehensive flow cytometry of whole blood samples from 54 COVID-19 patients  
44 revealed a dramatic increase in the number of immature neutrophils. This increase  
45 strongly correlated with disease severity and was associated with elevated IL-6 and  
46 IP-10 levels, two key players in the cytokine storm. The most pronounced decrease  
47 in cell counts was observed for CD8 T-cells and VD2  $\gamma\delta$  T-cells, which both exhibited  
48 increased differentiation and activation. ROC analysis revealed that the count ratio of  
49 immature neutrophils to CD8 or VD2 T-cells predicts pneumonia onset (0.9071) as  
50 well as hypoxia onset (0.8908) with high sensitivity and specificity. It would thus be a  
51 useful prognostic marker for preventive patient management and improved  
52 healthcare resource management.

## 53 **Introduction**

54 Severe Acute Respiratory Syndrome coronavirus 2 (SARS-CoV-2) first appeared in  
55 Wuhan, China in late 2019. It is a novel pathogen responsible for the coronavirus  
56 disease 2019 (COVID-19) pandemic <sup>1</sup>. COVID-19 patients experience a wide  
57 spectrum of clinical manifestations that ranges from low-grade fever and mild  
58 respiratory symptoms, to more severe forms. This including acute respiratory  
59 distress syndrome (ARDS), which requires provision of supplemental oxygen, and in  
60 some cases intubation and mechanical ventilation <sup>2-5</sup>. However, it remains unclear  
61 how SARS-CoV-2 infection affects the activation of immune cells and their  
62 contribution towards the severity of disease outcomes in patients.

63 Previous clinical studies reported associations with clinical blood counts, while  
64 others have specifically assessed T-cell subsets for activation and exhaustion  
65 markers <sup>6-9</sup>. Since strong evidence points to a cytokine storm as the culprit for  
66 disease severity <sup>10,11</sup>, various groups have investigated cytokine-secreting  
67 pathogenic T-cells and inflammatory monocytes that could have triggered this  
68 phenomenon <sup>6-9</sup>. In addition, flow cytometry analysis in COVID-19 patients has also  
69 shown a polarisation towards the Th17 subtype and a highly activated and  
70 exhausted CD8<sup>+</sup> T-cell compartment <sup>12,13</sup>. All these studies were carried out on  
71 peripheral blood mononuclear cells (PBMCs), thus excluding most granulocyte  
72 populations <sup>12,13</sup>. However, to elucidate all the immune subsets that could potentially  
73 trigger severe COVID-19 pathology, it is imperative to perform comprehensive whole  
74 blood immunophenotyping of COVID-19 patients which includes granulocyte  
75 populations.

76 In this study, we employed high dimensional flow cytometry to analyse a wide  
77 spectrum of more than 50 subsets of the myeloid and lymphoid immune cell

78 compartments. The study was carried out during the ongoing SARS-CoV-2  
79 pandemic in Singapore with a cohort of 54 COVID-19 patients who presented with  
80 varied clinical manifestations ranging from mild to fatal outcomes. This  
81 comprehensive immunophenotyping allowed the identification of immature  
82 neutrophils, CD8 T-cells and gamma delta (VD) 2 T-cells as key immune cell  
83 populations that undergo substantial changes in the cell counts across the spectrum  
84 of clinical severity. Their numbers, in fact, represent an early and robust prognosis  
85 value as shown by 'receiver operating characteristics' (ROC) analysis.

## 86 **Results**

### 87 **Circulating myeloid populations are reduced in COVID-19 patients**

88 A total of 54 patients with laboratory-confirmed SARS-CoV-2 infection were recruited  
89 at the National Centre for Infectious Diseases (NCID), Singapore from end March to  
90 mid-May 2020 (Supplementary Table 1). Blood was collected from 54 patients upon  
91 enrollment at a median 7 days post-illness onset (pio), from 28 patients who had  
92 recovered from COVID-19 disease (median 30 days pio, Supplementary Table 1)  
93 and 19 healthy donors (Supplementary Table 2). Immunophenotyping of whole blood  
94 samples was carried out with three distinct flow cytometry panels to analyse myeloid,  
95 granulocyte and lymphoid subsets. (Figure 1A, Supplementary Table 3). Each panel  
96 was supplemented with counting beads to allow accurate assessment of cell counts.  
97 19 of the 54 acute patients had paired plasma samples that permitted quantification  
98 of immune mediators by Luminex multiplex microbead-based immunoassay. The  
99 cohort was strongly biased towards males of which two patients had fatal outcomes  
100 (3.7%).

101 The FACS analysis revealed a declined cell count for eosinophils, basophils,  
102 total T-cells, dendritic cells (DCs), natural killer (NK) CD56 Bright, and plasmacitoid  
103 DCs (pDCs) in patients with acute COVID-19 infection (Figure 1B, Supplementary  
104 Figure 1A). No significant changes were observed for B-cells, total monocytes, and  
105 total NK cells (Figure 1B, Supplementary Figure 1A). Unbiased analysis by Uniform  
106 Manifold Approximation and Projection (UMAP) and graph-based clustering however  
107 identified with CD169<sup>+</sup> monocytes and CD11b<sup>high</sup> neutrophils, two additional clusters  
108 with high variation in acute patients (Figure 1C). Further analysis showed that the  
109 monocytes presented with an increased expression of CD169 (strong type I  
110 interferon signature marker <sup>14</sup>), increased expression of CD11b and HLA-DR, as

111 well as CD33, a constitutive PI3K signaling inhibitor<sup>15,16</sup> (Figure 1D, Supplementary  
112 Figure 1B).

113 Similar to the monocytes, neutrophils showed a significant upregulation of  
114 CD11b, CD66b, Siglec 8, CD38 and HLA-DR, suggesting that they were activated in  
115 response to SARS-CoV-2 infection (Figure 1E, Supplementary Figure 1C).  
116 Interestingly, despite this activation phenotype, an increase in the overall number of  
117 circulating neutrophils during acute SARS-CoV-2 infection based on conventional  
118 phenotypic markers (CD66b and CD16) was observed only in a small subset of our  
119 cohort (Figure 1F). However, in-depth analysis of neutrophil subsets allows  
120 discrimination between immature (CD16<sup>low/high</sup>CD10<sup>-</sup>) and mature (CD10<sup>+</sup>) subsets  
121 (Figure 1G)<sup>17-19</sup>. Overall, a significant increase of immature neutrophil numbers was  
122 observed in acute patients as compared to healthy donors or recovered patients,  
123 while the number of mature neutrophils decreased (Figure 1H).

124

### 125 **CD8 and $\gamma\delta$ T-cell populations are the most affected lymphocyte subsets**

126 To better characterise COVID-19-induced lymphopenia, levels of CD8, CD4,  $\gamma\delta$  (i.e.  
127 VD1 and VD2), and mucosal-associated invariant T-cells (MAIT,  
128 CD3<sup>+</sup>VA7.2<sup>+</sup>CD161<sup>+</sup>) were assessed during acute infection. Results showed a  
129 decrease in circulating MAIT, CD8<sup>+</sup> and VD2 T-cells (Figure 2A). However,  
130 circulating VD1 T-cells did not vary in numbers, and CD4<sup>+</sup> T-cells did not show a  
131 significant decrease during acute infection (Figure 2A). Interestingly, levels of  
132 regulatory T-cells (Treg) and CD4<sup>+</sup>CD161<sup>+</sup> T-cells increased in recovered patients as  
133 compared to acute patients (Figure 2A).

134 Next, UMAP analysis was done on CD3<sup>+</sup> cells to visualise changes in  
135 differentiation states within the T-cell compartments (Figure 2B). UMAP visualisation

136 suggests that phenotypic modulation in the CD8<sup>+</sup> cluster was the most pronounced  
137 during SARS-CoV-2 infection (Figure 2B). In order to validate this observation,  
138 CD45RA and CD27 markers were used to analyse the frequency of naïve  
139 (CD45RA<sup>+</sup>CD27<sup>+</sup>), central memory (CM, CD45RA<sup>-</sup>CD27<sup>+</sup>), effector memory (EM,  
140 CD45RA<sup>-</sup>CD27<sup>-</sup>) and terminal effector (TEMRA, CD45RA<sup>+</sup>CD27<sup>-</sup>) amongst the T-cell  
141 populations (Figure 2C, Supplementary Figure 2A). In agreement with the UMAP  
142 analysis, CD8<sup>+</sup> T-cells showed a change in differentiation profile from naïve in favour  
143 of EM and TEMRA (Figure 2C). Noticeably, the frequency of naïve CD4<sup>+</sup> T-cells  
144 decreased but was not reflected in a significant increase of a specific differentiated  
145 population (Figure 2C).

146 In addition, UMAP analysis also suggested changes in VD1 and VD2  
147 populations that were not reflected in terms of differentiation (Figure 2B-C).  
148 Therefore, we investigated the expression of general activation marker CD38 (Figure  
149 2D). In this context, we observed that all differentiation stages of CD8<sup>+</sup> T-cells, VD1  
150 and VD2, had higher expression of CD38 except VD2 TEMRA (Figure 2E). On the  
151 other hand, CD4<sup>+</sup> T-cells only showed activation of the TEMRA compartment (Figure  
152 2E). Together, our data suggest that while circulating cell counts were generally  
153 decreased for T-cells, SARS-CoV-2 differentially impacts the different T-cell subsets  
154 in terms cell counts, differentiation and expression of CD38.

155

### 156 **Granularity of clinical severity is reflected by immune cell counts**

157 In order to associate the data with the clinical severity we separated the patients into  
158 four different groups: no pneumonia, pneumonia only, pneumonia and hypoxia, and  
159 pneumonia and hypoxia requiring ICU admission (Figure 3A)<sup>20,21</sup>. This allowed  
160 estimation of cell counts in those groups and identification of markers that potentially



161 depict disease severity. Consistent with previous studies on CD4 and CD8  
162 lymphopenia<sup>6,22,23</sup>, CD8<sup>+</sup>, CD4<sup>+</sup>, MAIT, VD1 and VD2 T-cells showed a gradual  
163 reduction in the peripheral blood with increasing disease severity (Figure 3B). The  
164 effect was more pronounced for CD8<sup>+</sup> and VD2 T-cells (Figure 3B), suggesting a  
165 strong activation and infiltration of these cells in the lungs.

166 Cell counts in various myeloid subsets showed a similar decreasing profile  
167 with severity for pDCs, DCs, classical and intermediate monocytes (Figure 3C). In  
168 contrast to cell counts, myeloid activation markers showed differential trends with  
169 severity (Figure 3D). CD86 expression on DCs, HLA-DR and CD33 expression on  
170 monocytes followed a gradual decrease with increasing severity (Figure 3D).  
171 Expression of CD169 on monocytes was decreased in ICU patients, while CD86  
172 expression on pDCs was consistent across severity groups (Figure 3D). Together,  
173 these results suggest that the remaining circulating monocytes and DCs in severe  
174 cases have a dysregulated phenotype.

175 While total circulating neutrophils showed no significant change with disease  
176 severity, neutrophilia was only observed in some patients with severe clinical  
177 complications (Figure 3E). Particularly, there was a change in the composition of  
178 neutrophil subsets in accordance to disease severity, where an increase in the  
179 immature neutrophil cell count and frequency was accompanied with a decrease of  
180 mature neutrophils (Figure 3E). These results suggest that immature neutrophils  
181 could reflect disease severity much more accurately than total neutrophil counts.

182

### 183 **Immature neutrophil absolute count correlates with cytokines**

184 Neutrophil-to-Lymphocyte Ratio (NLR) or Neutrophil-to-CD8 T-cell Ratio (N8R) were  
185 proposed to be good diagnostic and prognostic markers for severe COVID-19

186 respiratory disease<sup>23,24</sup>. However, these studies observed increased neutrophils in  
187 severe cases which was not consistent with our observations and in another study<sup>25</sup>  
188 (Figure 1F and 3E). To validate that the identified populations would be good  
189 markers of disease severity, a correlation analysis with analyte levels in available  
190 paired plasma samples was performed (Figure 4A, Supplementary Figure 3).  
191 Interestingly, strong correlation scores were observed between analytes and  
192 immature neutrophil counts (Figure 4A, Supplementary Figure 3A), rather than with  
193 total neutrophil counts (Figure 4A, Supplementary Figure 3B). The strongest  
194 correlations were observed between immature neutrophil counts and IL-6  
195 ( $\rho=0.6747$ ,  $p=0.0015$ ), and IP-10 ( $\rho=0.7596$ ,  $p=0.0002$ ) (Figure 4B).

196 In addition, strong correlations were also observed between mature  
197 neutrophils, monocytes and intermediate monocytes, as well as CD8 and VD2 T-cell  
198 counts (Supplementary Figure 3C). These results suggest that immature neutrophils  
199 counts can potentially be used as sensitive and reliable indicators of disease  
200 severity.

201

### 202 **Immature neutrophil to VD2 T-cell ratio as an improved prognostic marker**

203 We next assessed if an immature neutrophil-to-CD8 T-cells ratio (iN8R) or VD2 T-  
204 cell counts ratio (iNVD2R) could be a better prognostic marker of disease severity as  
205 compared to the current proposed NLR and N8R<sup>23,24</sup>. To differentiate patients with  
206 and without pneumonia, iNVD2R performed better than N8R or iN8R with an area  
207 under receiver operating characteristic (AUROC) curve of 0.8451 (95% confidence  
208 interval CI: 0.7379-0.9523) vs 0.806 (95% CI: 0.6911-0.9210) and 0.7158 (95% CI:  
209 0.5754-0.8562) respectively (Figure 5A). In addition, to differentiate patients with and  
210 without hypoxia, an AUROC of 0.9111 (95% CI: 0.8306-0.9916) was obtained for

211 iNVD2R as compared to 0.8931 (95% CI: 0.8044-0.9817) for iN8R and 0.7958 (95%  
212 CI: 0.6781-0.9136) for N8R. These results indicate that iNVD2R and iN8R could be  
213 good markers for severe respiratory disease.

214 To assess if this analysis could have predictive prognostic value in  
215 hospitalisation settings to improve patient management, we repeated the analysis  
216 with the samples that were acquired before 7 days pio (24 patients, median pio = 3  
217 days). AUROC for iNVD2R showed strong prognostic value for pneumonia onset  
218 (0.9071) as well as for onset of hypoxia (0.8908) (Figure 5B, Table 1). Our data  
219 show that immature neutrophil counts are better in predicting disease severity as  
220 compared to total neutrophil counts. Importantly, they can be used in a ratio with  
221 CD8 or VD2 lymphocyte counts to improve the current N8R predictive ratio.

## 222 **Discussion**

223 In this study, immunophenotyping of peripheral blood from COVID-19 patients  
224 revealed a significant shift in the ratio between mature and immature neutrophils  
225 associating with severity. The increased numbers of immature neutrophils and the  
226 disappearance of mature neutrophils likely reflect gradual and sustained mobilisation  
227 of these cells into the lungs in response to an ongoing inflammation, leading to  
228 premature release of immature neutrophils from the bone marrow <sup>19</sup>. Supporting this  
229 hypothesis, a recent study investigated several myeloid populations between  
230 circulating PBMCs and the lung lavage of COVID-19 patients showed that  
231 granulocytes represent up to 80% of total CD45<sup>+</sup> lung infiltrates <sup>26</sup>. In addition,  
232 autopsies of COVID-19 fatalities showed typical lesions associated with toxic  
233 neutrophil effects <sup>27,28</sup>. In line with this observation, marked morphological  
234 abnormalities of the circulating neutrophils were reported in COVID-19 patients <sup>25</sup>.  
235 These cells present typical hallmarks of immature neutrophils and their precursors  
236 such as band shaped nuclei and a lower expression of CD10 and CD16 <sup>29</sup>.  
237 Consistent with our data, a recent study on a small number of patients reported that  
238 the presence of "low density inflammatory neutrophils" was strongly associated with  
239 disease severity and IL-6 levels <sup>30</sup>. This CD11b<sup>int</sup>CD44<sup>low</sup>CD16<sup>int</sup> low density  
240 neutrophil population is likely constituted primarily of CD10<sup>-</sup> immature neutrophils.

241 In addition, immature neutrophil numbers strongly correlated with IL-6 and IP-  
242 10. IL-6 and IP-10 are consistently upregulated during a cytokine storm and are  
243 associated with severe ARDS <sup>9,10,31,32</sup>. While some studies report inflammatory  
244 monocytes as the source of IL-6 <sup>9,33,34</sup>, our results suggest that immature neutrophils  
245 could also be a non-negligible source of IL-6 during COVID-19-induced cytokine  
246 storm. Indeed, neutrophils have been found to produce biologically relevant amounts

247 of IL-6 after engagement of TLR8, a toll like receptor recognising single strand RNAs  
248 of viral or bacterial origin <sup>35,36</sup>. Since IL-17 operates upstream of IL-1 and IL-6, and is  
249 a major orchestrator of sustained neutrophils mobilisation <sup>37</sup>, it is plausible that IL-17  
250 could significantly affect the neutrophils compartment in COVID-19 patients.  
251 Consistent with this hypothesis, CD4 T-cells in COVID-19 patients are skewed  
252 towards a Th17 phenotype <sup>13</sup>, and we also observed increased CD4<sup>+</sup>CD161<sup>+</sup> T-cells  
253 in recovered patients. These CD4<sup>+</sup>CD161<sup>+</sup> T-cells are known to be either IL-17  
254 producer cells or their precursors <sup>38</sup>. Thus, our results could reflect the re-circulation  
255 of these cells from the lung or secondary lymphoid organs after infection and support  
256 the possibility of IL-17 in mediating neutrophil damage to the lungs. Together, this  
257 would support proposed anti-IL-17 or JAK2 inhibitor therapies for severe COVID-19  
258 disease <sup>39-41</sup>.

259 In addition to the changes in the heterogeneity of neutrophils, a strong  
260 decrease in T-cells was observed, especially in subsets that possess cytolytic  
261 activity such as CD8, VD1 and VD2 T-cells. These results are consistent with other  
262 studies showing a decrease of CD8<sup>+</sup> during COVID-19 disease <sup>12,13</sup>. As for VD2 T-  
263 cells, which are not MHC-restricted T-cells <sup>42,43</sup>, we showed a general decrease in  
264 the periphery with disease severity. This is in line with other inflammatory disease  
265 such as psoriasis <sup>44</sup> and Crohn's disease <sup>45</sup>. However, in the lungs, during chronic  
266 obstructive pulmonary disease,  $\gamma\delta$  T-cell counts have been reported to be  
267 significantly lower in induced sputum (IS) and bronchoalveolar lavage (BAL) but not  
268 in peripheral blood, suggesting unclear inflammatory mechanisms that could  
269 influence  $\gamma\delta$  T-cells counts in the periphery <sup>46</sup>. Interestingly,  $\gamma\delta$  T-cells, in particular  
270 VD2, are known to participate in influenza immune response <sup>47</sup>, and actively recruit  
271 and activate neutrophils to the site of infection or inflammation <sup>48,49</sup>. Activated,

272 neutrophils have also been found to inhibit  $\gamma\delta$  T-cells functional capacity, promoting  
273 the resolution of inflammation<sup>50,51</sup>. Therefore, it will be essential to investigate the  
274 neutrophil to  $\gamma\delta$  T-cells relationship present in lungs of SARS-CoV-2 infected  
275 patients.

276 During aging, VD2 T-cell counts in the periphery have been shown to  
277 decrease with age. Elderly individuals generally have systemic chronic low-grade  
278 inflammation, which we previously termed “inflamm-aging”, with higher basal levels  
279 of molecules such as CRP, TNF-a and IL-6<sup>52,53</sup>. These similarities in modulation of  
280 VD2 T-cell counts and cytokines between COVID-19 severity and aging could  
281 explain why elderly individuals are more susceptible to severe disease, since they  
282 have a higher basal level of inflammation and lower level of VD2 T-cells as  
283 compared to the young.

284 Our results indicate that an early post illness onset iNVD2R, accessible  
285 through a simple 5 colours flow cytometry panel (CD3; VD2; CD66b/CD15; CD10;  
286 CD45), would be an excellent prognostic screening tool for predicting probable  
287 patient progression to pneumonia or hypoxia. Moreover, CD8 could also be included  
288 in the flow cytometry panel as a fallback option since VD2 counts could be  
289 decreased by medication, such as Azathioprine, as well as underlying conditions,  
290 such as inflammatory bowel disease, aging or psoriasis, which could be risk factors  
291 for COVID-19<sup>45</sup>. Analysis of the proposed parameter would allow for a more  
292 accurate and earlier prognosis due to the interconnection between neutrophils and  
293 V $\delta$ 2 T cells, which can then be utilised for early therapeutic interventions, improve  
294 patient triage and better healthcare resource management.

## 295 **Material and Methods**

### 296 **Study design**

297 This was an observational cohort study of patients with PCR-confirmed COVID-19  
298 who were admitted to the National Centre for Infectious Diseases, Singapore. All  
299 patients with COVID-19 in Singapore, regardless of the severity of infection, are  
300 admitted to isolation facilities until clinical recovery and viral clearance. Supportive  
301 therapy including supplemental oxygen and symptomatic treatment were  
302 administered as required. Patients with moderate to severe hypoxia (defined as  
303 requiring fraction of inspired oxygen [ $\text{FiO}_2$ ]  $\geq 40\%$ ) were transferred to the intensive  
304 care for further management including invasive mechanical ventilation where  
305 necessary.

306 Sample Size: No power analysis was done. Sample size was based on sample  
307 availability. Randomization: No randomization was done. Blinding: Clinical  
308 parameters were made available after data analysis.

309

### 310 **Ethics statement**

311 Written informed consent was obtained from participants in accordance with the  
312 tenets of the Declaration of Helsinki. For COVID-19 blood/plasma collection, “A  
313 Multi-centred Prospective Study to Detect Novel Pathogens and Characterize  
314 Emerging Infections (The PROTECT study group)”, a domain specific review board  
315 (DSRB) evaluated the study design and protocol, which was approved under study  
316 number 2012/00917. Healthy volunteers samples were obtained under the following  
317 IRB “Study of blood cell subsets and their products in models of infection,  
318 inflammation and immune regulation” under the CIRB number 2017/2806 from  
319 SingHealth (Singapore).

320

321 **Donor information**

322 Patients who tested PCR-positive for SARS-CoV-2 in a respiratory sample from  
323 February to April 2020 were recruited into the study <sup>54</sup>. Demographic data, disease  
324 onset date, clinical score and SARS-CoV-2 RT-PCR results during the  
325 hospitalisation period were retrieved from patient clinical records. Relevant  
326 information are given in Supplementary Table 1. Patients were classified in different  
327 clinical severity groups depending on the presence of pneumonia, hypoxia and the  
328 need for ICU hospitalisation. For healthy volunteers, demographic data are provided  
329 in Supplementary Table 2. Blood was collected in VACUETTE EDTA tubes (Greiner  
330 Bio, #455036) or Cell Preparation Tubes (CPT) (BD, #362753) and 100  $\mu$ L of whole  
331 blood was extracted for each FACS staining panel (Supplementary Table 3).

332

333 **Multiplex microbead-based immunoassay**

334 When available, plasma fraction was harvested after 20 minutes centrifugation at  
335 1700 x *g* of blood collected in BD Vacutainer CPT tubes (BD, #362753). Plasma  
336 samples were treated by solvent/detergent treatment with a final concentration of 1%  
337 Triton X-100 (Thermo Fisher Scientific, #28314) for virus inactivation at RT for 2  
338 hours in the dark under stringent Biosafety laboratory 2+ conditions (approved by  
339 Singapore Ministry of Health) <sup>55</sup>. Immune mediator levels in COVID-19 patient  
340 plasma samples across acute samples were measured with by Luminex using the  
341 Cytokine/Chemokine/Growth Factor 45-plex Human ProcartaPlex™ Panel 1  
342 (ThermoFisher Scientific, #EPX450-12171-901). Data acquisition was performed on  
343 FLEXMAP® 3D (Luminex) using xPONENT® 4.0 (Luminex) software. Data analysis  
344 was done on Bio-Plex Manager™ 6.1.1 (Bio-Rad). Standard curves were generated



345 with a 5-PL (5-parameter logistic) algorithm, reporting values for both mean  
346 fluorescence intensity (MFI) and concentration data. Internal control samples were  
347 included in each Luminex assay run to allow for detection and normalisation of plate-  
348 to-plate and batch-to-batch variation. A correction factor was obtained from the  
349 differences observed across the multiple assays with these controls and this  
350 correction factor was then used to normalise all the samples. Analyte concentrations  
351 were logarithmically transformed to ensure normality. Analytes that were not  
352 detectable in patient samples were assigned the value of logarithmic transformation  
353 of Limit of Quantification (LOQ).

354

### 355 **Flow cytometry**

356 Whole blood was stained with antibodies as stated in Supplementary Table 3 (100  
357  $\mu$ L of whole blood per flow cytometry panel) for 20 minutes in the dark at RT.  
358 Samples were then supplemented with 0.5 mL of 1.2X BD FACS lysing solution (BD  
359 349202). Final FACS lysing solution concentration taking into account volume in tube  
360 before addition is 1X. Samples were vortexed and incubated for 10 min at RT. 500  
361  $\mu$ L of PBS (Gibco, #10010-031) was added to wash the samples and centrifugated  
362 at 300 x g for 5 min. Washing step of samples were repeated with 1 mL of PBS.  
363 Samples were then transferred to polystyrene FACS tubes containing 10  $\mu$ L (10800  
364 beads) of CountBright Absolute Counting Beads (Invitrogen, #36950). Samples  
365 were then acquired using BD LSRII 5 laser configuration using automatic  
366 compensations and running BD FACS Diva Software version 8.0.1 (build 2014 07 03  
367 11 47), Firmware version 1.14 (BDLSR II), CST version 3.0.1, PLA version 2.0.  
368 Analysis of flow cytometric data was performed with FlowJo version 10.6.1. Gating

369 strategies for panels A, B and C are presented in Supplementary Figures 4, 5 and 6  
370 respectively.

371

### 372 **Statistical analysis**

373 Statistical analysis was performed using Prism 8 (Graph Pad Software, Inc). For  
374 comparisons of absolute cell counts or frequency, Kruskal-Wallis Test corrected with  
375 Dunn's method was performed. For comparisons of geometric Mean Fluorescence  
376 Intensity (gMFI) between three or more independent groups, Brown-Forsythe and  
377 Welch ANOVA using Dunnett T3 correction for multiple comparison was performed.  
378 For correlation analysis, spearman rank correlation was performed. p-values < 0.05  
379 for correlations, while adjusted p-values < 0.05 for all the other comparisons were  
380 considered significant.

381

### 382 **Data analysis and UMAP visualisation**

383 UMAP: Gated cells were manually exported using FlowJo (Tree Star Inc.). Samples  
384 were then used for UMAP analysis using cytofkit2 R Packages with RStudio v3.5.2  
385 <sup>56</sup>. Five healthy, six acute and four recovered patients were each concatenated to its  
386 respective groups and 100000 cells were analysed using the ceil method. Custom R  
387 scripts were used to generate Z-score and correlation heatmaps.

## 388 **Acknowledgements**

389 Authors would like to acknowledge all the support received on this project from the  
390 Singapore Immunology Network (SIgN), LN lab members Chek Meng Poh and  
391 Anthony Torres Ruesta, and SIgN flow cytometry facility, especially Ivy Chay Huang  
392 Low. We would also like to thank the study participants who donated their blood  
393 samples to this project, and the healthcare workers caring for COVID-19 patients.

394

## 395 **Author contributions**

396 GC, WX, IK conceptualised, designed the panels, acquired, analysed and interpreted  
397 the data, and wrote the manuscript. MYA processed the patient blood, stained and  
398 fixed the samples. YHC, SWF, KJP, BL, CYPL,SNA, NKWY, RSLC, WH, AA,  
399 acquired and analysed the data. EFB, SSWC, BEY, YSL and DCL designed and  
400 supervised sample collection. OR, LR, LGN, AL and LFPN conceptualised,  
401 designed, analysed and wrote the manuscript. All authors revised and approved the  
402 final version of the manuscript.

403

## 404 **Competing interests**

405 The authors declare no competing interests.

406

## 407 **Funding**

408 This work was supported by Singapore Immunology Network core research grant,  
409 the A\*STAR COVID-19 Research funding (H/20/04/g1/006) provided to Singapore  
410 Immunology Network by the Biomedical Research Council (BMRC), A\*STAR.  
411 Subject recruitment and sample collection were funded by the National Medical  
412 Research Council (NMRC) COVID-19 Research fund (COVID19RF-001). The SIgN

413 flow cytometry and the Multiple analyte platforms were supported a grant from the  
414 National Research Foundation, Immunomonitoring Service Platform (ISP)  
415 (#NRF2017\_SISFP09).

416 **Data availability**

417 Data can be obtained upon reasonable request to the corresponding author.

## 418 References

- 419 1 Cohen, J. & Normile, D. New SARS-like virus in China triggers alarm. *Science* **367**, 234-235,  
420 doi:10.1126/science.367.6475.234 (2020).
- 421 2 Guan, W. J., Ni, Z. Y., Hu, Y., Liang, W. H., Ou, C. Q., He, J. X., Liu, L., Shan, H., Lei, C. L.,  
422 Hui, D. S. C., Du, B., Li, L. J., Zeng, G., Yuen, K. Y., Chen, R. C., Tang, C. L., Wang, T.,  
423 Chen, P. Y., Xiang, J., Li, S. Y., Wang, J. L., Liang, Z. J., Peng, Y. X., Wei, L., Liu, Y., Hu, Y.  
424 H., Peng, P., Wang, J. M., Liu, J. Y., Chen, Z., Li, G., Zheng, Z. J., Qiu, S. Q., Luo, J., Ye, C.  
425 J., Zhu, S. Y., Zhong, N. S. & China Medical Treatment Expert Group for, C. Clinical  
426 Characteristics of Coronavirus Disease 2019 in China. *N Engl J Med*,  
427 doi:10.1056/NEJMoa2002032 (2020).
- 428 3 Wu, Z. & McGoogan, J. M. Characteristics of and Important Lessons From the Coronavirus  
429 Disease 2019 (COVID-19) Outbreak in China: Summary of a Report of 72314 Cases From  
430 the Chinese Center for Disease Control and Prevention. *JAMA*, doi:10.1001/jama.2020.2648  
431 (2020).
- 432 4 Wang, D., Hu, B., Hu, C., Zhu, F., Liu, X., Zhang, J., Wang, B., Xiang, H., Cheng, Z., Xiong,  
433 Y., Zhao, Y., Li, Y., Wang, X. & Peng, Z. Clinical Characteristics of 138 Hospitalized Patients  
434 With 2019 Novel Coronavirus-Infected Pneumonia in Wuhan, China. *JAMA*,  
435 doi:10.1001/jama.2020.1585 (2020).
- 436 5 Chen, N., Zhou, M., Dong, X., Qu, J., Gong, F., Han, Y., Qiu, Y., Wang, J., Liu, Y., Wei, Y.,  
437 Xia, J., Yu, T., Zhang, X. & Zhang, L. Epidemiological and clinical characteristics of 99 cases  
438 of 2019 novel coronavirus pneumonia in Wuhan, China: a descriptive study. *Lancet* **395**, 507-  
439 513, doi:10.1016/S0140-6736(20)30211-7 (2020).
- 440 6 Chen, G., Wu, D., Guo, W., Cao, Y., Huang, D., Wang, H., Wang, T., Zhang, X., Chen, H.,  
441 Yu, H., Zhang, M., Wu, S., Song, J., Chen, T., Han, M., Li, S., Luo, X., Zhao, J. & Ning, Q.  
442 Clinical and immunological features of severe and moderate coronavirus disease 2019. *J Clin*  
443 *Invest* **130**, 2620-2629, doi:10.1172/JCI137244 (2020).
- 444 7 Zheng, H. Y., Zhang, M., Yang, C. X., Zhang, N., Wang, X. C., Yang, X. P., Dong, X. Q. &  
445 Zheng, Y. T. Elevated exhaustion levels and reduced functional diversity of T cells in  
446 peripheral blood may predict severe progression in COVID-19 patients. *Cell Mol Immunol*,  
447 doi:10.1038/s41423-020-0401-3 (2020).
- 448 8 Qin, C., Zhou, L., Hu, Z., Zhang, S., Yang, S., Tao, Y., Xie, C., Ma, K., Shang, K., Wang, W.  
449 & Tian, D. S. Dysregulation of immune response in patients with COVID-19 in Wuhan, China.  
450 *Clin Infect Dis*, doi:10.1093/cid/ciaa248 (2020).
- 451 9 Zhou, Y., Fu, B., Zheng, X., Wang, D., Zhao, C., Qi, Y., Sun, R., Tian, Z., Xu, X. & Wei, H.  
452 Pathogenic T cells and inflammatory monocytes incite inflammatory storm in severe COVID-  
453 19 patients. *National Science Review*, doi:10.1093/nsr/nwaa041 (2020).
- 454 10 Huang, C., Wang, Y., Li, X., Ren, L., Zhao, J., Hu, Y., Zhang, L., Fan, G., Xu, J., Gu, X.,  
455 Cheng, Z., Yu, T., Xia, J., Wei, Y., Wu, W., Xie, X., Yin, W., Li, H., Liu, M., Xiao, Y., Gao, H.,  
456 Guo, L., Xie, J., Wang, G., Jiang, R., Gao, Z., Jin, Q., Wang, J. & Cao, B. Clinical features of  
457 patients infected with 2019 novel coronavirus in Wuhan, China. *Lancet* **395**, 497-506,  
458 doi:10.1016/S0140-6736(20)30183-5 (2020).
- 459 11 Hadjadj, J., Yatim, N., Barnabei, L., Corneau, A., Boussier, J., Pere, H., Charbit, B., Bondet,  
460 V., Chenevier-Gobeaux, C., Breillat, P., Carlier, N., Gauzit, R., Morbieu, C., Pene, F., Marin,  
461 N., Roche, N., Szwedebel, T.-A., Smith, N., Merklings, S., Treluyer, J.-M., Veyer, D., Mouthon, L.,  
462 Blanc, C., Tharaux, P.-L., Rozenberg, F., Fischer, A., Duffy, D., Rieux-Laucat, F., Kerneis, S.  
463 & Terrier, B. Impaired type I interferon activity and exacerbated inflammatory responses in  
464 severe Covid-19 patients. *Preprint at*  
465 <https://www.medrxiv.org/content/medrxiv/early/2020/04/23/2020.04.19.20068015.full.pdf>,  
466 2020.2004.2019.20068015, doi:10.1101/2020.04.19.20068015 (2020).
- 467 12 Xu, Z., Shi, L., Wang, Y., Zhang, J., Huang, L., Zhang, C., Liu, S., Zhao, P., Liu, H., Zhu, L.,  
468 Tai, Y., Bai, C., Gao, T., Song, J., Xia, P., Dong, J., Zhao, J. & Wang, F. S. Pathological  
469 findings of COVID-19 associated with acute respiratory distress syndrome. *Lancet Respir*  
470 *Med* **8**, 420-422, doi:10.1016/S2213-2600(20)30076-X (2020).
- 471 13 Biasi, S., Meschieri, M., Gibellini, L., Bellinazzi, C., Borella, R., Fidanza, L., Tartaro, D.,  
472 Mattioli, M., Paolini, A., Menozzi, M., Milic, J., Franceschi, G., Fantini, R., Tonelli, R., Sita, M.,  
473 Sarti, M., Clini, E., Girardis, M., Guaraldi, G. & Cossarizza, A. Marked T cell activation,  
474 senescence, exhaustion and skewing towards TH17 in patients with Covid-19 pneumonia.  
475 *Preprint at https://www.researchsquare.com/article/rs-23957/v1*, doi:10.21203/rs.3.rs-  
476 23957/v1 (2020).

- 477 14 Bourgoin, P., Biechele, G., Ait Belkacem, I., Morange, P. E. & Malergue, F. Role of the  
478 interferons in CD64 and CD169 expressions in whole blood: Relevance in the balance  
479 between viral- or bacterial-oriented immune responses. *Immun Inflamm Dis* **8**, 106-123,  
480 doi:10.1002/iid3.289 (2020).
- 481 15 Lajaunias, F., Dayer, J. M. & Chizzolini, C. Constitutive repressor activity of CD33 on human  
482 monocytes requires sialic acid recognition and phosphoinositide 3-kinase-mediated  
483 intracellular signaling. *Eur J Immunol* **35**, 243-251, doi:10.1002/eji.200425273 (2005).
- 484 16 Lubbers, J., Rodriguez, E. & van Kooyk, Y. Modulation of Immune Tolerance via Siglec-Sialic  
485 Acid Interactions. *Front Immunol* **9**, 2807, doi:10.3389/fimmu.2018.02807 (2018).
- 486 17 Marini, O., Costa, S., Bevilacqua, D., Calzetti, F., Tamassia, N., Spina, C., De Sabata, D.,  
487 Tinazzi, E., Lunardi, C., Scupoli, M. T., Cavallini, C., Zoratti, E., Tinazzi, I., Marchetta, A.,  
488 Vassanelli, A., Cantini, M., Gandini, G., Ruzzenente, A., Guglielmi, A., Missale, F., Vermi, W.,  
489 Tecchio, C., Cassatella, M. A. & Scapini, P. Mature CD10(+) and immature CD10(-)  
490 neutrophils present in G-CSF-treated donors display opposite effects on T cells. *Blood* **129**,  
491 1343-1356, doi:10.1182/blood-2016-04-713206 (2017).
- 492 18 Evrard, M., Kwok, I. W. H., Chong, S. Z., Teng, K. W. W., Becht, E., Chen, J., Sieow, J. L.,  
493 Penny, H. L., Ching, G. C., Devi, S., Adrover, J. M., Li, J. L. Y., Liong, K. H., Tan, L., Poon, Z.,  
494 Foo, S., Chua, J. W., Su, I. H., Balabanian, K., Bachelier, F., Biswas, S. K., Larbi, A.,  
495 Hwang, W. Y. K., Madan, V., Koeffler, H. P., Wong, S. C., Newell, E. W., Hidalgo, A.,  
496 Ginhoux, F. & Ng, L. G. Developmental Analysis of Bone Marrow Neutrophils Reveals  
497 Populations Specialized in Expansion, Trafficking, and Effector Functions. *Immunity* **48**, 364-  
498 379 e368, doi:10.1016/j.immuni.2018.02.002 (2018).
- 499 19 Ng, L. G., Ostuni, R. & Hidalgo, A. Heterogeneity of neutrophils. *Nat Rev Immunol* **19**, 255-  
500 265, doi:10.1038/s41577-019-0141-8 (2019).
- 501 20 Young, B. E., Ong, S. W. X., Kalimuddin, S., Low, J. G., Tan, S. Y., Loh, J., Ng, O. T.,  
502 Marimuthu, K., Ang, L. W., Mak, T. M., Lau, S. K., Anderson, D. E., Chan, K. S., Tan, T. Y.,  
503 Ng, T. Y., Cui, L., Said, Z., Kurupatham, L., Chen, M. I., Chan, M., Vasoo, S., Wang, L. F.,  
504 Tan, B. H., Lin, R. T. P., Lee, V. J. M., Leo, Y. S., Lye, D. C. & Singapore Novel Coronavirus  
505 Outbreak Research, T. Epidemiologic Features and Clinical Course of Patients Infected With  
506 SARS-CoV-2 in Singapore. *JAMA*, doi:10.1001/jama.2020.3204 (2020).
- 507 21 Young, B. E. a. O., Sean Wei Xiang and Ng, Lisa FP and Anderson, Danielle E. and Chia,  
508 Wan Ni and Chia, Po Ying and Ang, Li Wei and Mak, Tze-Minn and Kalimuddin, Shirin and  
509 Chai, Louis Yi Ann and Pada, Surinder and Tan, Seow Yen and Sun, Louisa and  
510 Parthasarathy, Purmina and Fong, Siew-Wai and Chan, Yi-Hao and Tan, Chee Wah and Lee,  
511 Bernett and Röttschke, Olaf and Ding, Ying and Tambyah, Paul and Low, Jenny GH and Cui,  
512 Lin and Barkham, Timothy and Lin, Raymond Tzer Pin and Leo, Yee-Sin and Renia, Laurent  
513 and Wang, Lin-Fa and Lye, David Chien and Team, Singapore 2019 Novel Coronavirus  
514 Outbreak Research. Immunological and Viral Correlates of COVID-19 Disease Severity: A  
515 Prospective Cohort Study of the First 100 Patients in Singapore (4/15/2020). Available at  
516 SSRN: <https://ssrn.com/abstract=3576846> or <http://dx.doi.org/10.2139/ssrn.3576846> (2020).
- 517 22 Cossarizza, A., De Biasi, S., Guaraldi, G., Girardis, M., Mussini, C. & (MoCo19)#, M. C.-W. G.  
518 SARS-CoV-2, the Virus that Causes COVID-19: Cytometry and the New Challenge for Global  
519 Health. *Cytometry A* **97**, 340-343, doi:10.1002/cyto.a.24002 (2020).
- 520 23 Liu, J., Li, S., Liu, J., Liang, B., Wang, X., Wang, H., Li, W., Tong, Q., Yi, J., Zhao, L., Xiong,  
521 L., Guo, C., Tian, J., Luo, J., Yao, J., Pang, R., Shen, H., Peng, C., Liu, T., Zhang, Q., Wu, J.,  
522 Xu, L., Lu, S., Wang, B., Weng, Z., Han, C., Zhu, H., Zhou, R., Zhou, H., Chen, X., Ye, P.,  
523 Zhu, B., Wang, L., Zhou, W., He, S., He, Y., Jie, S., Wei, P., Zhang, J., Lu, Y., Wang, W.,  
524 Zhang, L., Li, L., Zhou, F., Wang, J., Dittmer, U., Lu, M., Hu, Y., Yang, D. & Zheng, X.  
525 Longitudinal characteristics of lymphocyte responses and cytokine profiles in the peripheral  
526 blood of SARS-CoV-2 infected patients. *EBioMedicine* **55**, 102763,  
527 doi:10.1016/j.ebiom.2020.102763 (2020).
- 528 24 Lagunas-Rangel, F. A. Neutrophil-to-lymphocyte ratio and lymphocyte-to-C-reactive protein  
529 ratio in patients with severe coronavirus disease 2019 (COVID-19): A meta-analysis. *J Med*  
530 *Viro*, doi:10.1002/jmv.25819 (2020).
- 531 25 Zini, G., Bellesi, S., Ramundo, F. & d'Onofrio, G. Morphological anomalies of circulating blood  
532 cells in COVID-19. *Am J Hematol*, doi:10.1002/ajh.25824 (2020).
- 533 26 Sanchez-Cerrillo, I., Landete, P., Aldave, B., Sanchez-Alonso, S., Sanchez-Azofra, A.,  
534 Marcos-Jimenez, A., Avalos, E., Alcaraz-Serna, A., de los Santos, I., Mateu-Albero, T.,  
535 Esparcia, L., Lopez-Sanz, C., Martinez-Fleta, P., Gabrie, L., del Campo Guerola, L., Calzada,  
536 M. J., Gonzalez-Alvaro, I., Alfranca, A., Sanchez-Madrid, F., Munoz-Calleja, C., Soriano, J.



- 537 B., Ancochea, J. & Martin-Gayo, E. Differential Redistribution of Activated Monocyte and  
538 Dendritic Cell Subsets to the Lung Associates with Severity of COVID-19. *Preprint at*  
539 <https://www.medrxiv.org/content/medrxiv/early/2020/05/16/2020.05.13.20100925.full.pdf>,  
540 2020.2005.2013.20100925, doi:10.1101/2020.05.13.20100925 (2020).
- 541 27 Yao, X. H., Li, T. Y., He, Z. C., Ping, Y. F., Liu, H. W., Yu, S. C., Mou, H. M., Wang, L. H.,  
542 Zhang, H. R., Fu, W. J., Luo, T., Liu, F., Guo, Q. N., Chen, C., Xiao, H. L., Guo, H. T., Lin, S.,  
543 Xiang, D. F., Shi, Y., Pan, G. Q., Li, Q. R., Huang, X., Cui, Y., Liu, X. Z., Tang, W., Pan, P. F.,  
544 Huang, X. Q., Ding, Y. Q. & Bian, X. W. [A pathological report of three COVID-19 cases by  
545 minimal invasive autopsies]. *Zhonghua Bing Li Xue Za Zhi* **49**, 411-417,  
546 doi:10.3760/cma.j.cn112151-20200312-00193 (2020).
- 547 28 Barnes, B. J., Adrover, J. M., Baxter-Stoltzfus, A., Borczuk, A., Cools-Lartigue, J., Crawford,  
548 J. M., Dassler-Plenker, J., Guerci, P., Huynh, C., Knight, J. S., Loda, M., Looney, M. R.,  
549 McAllister, F., Rayes, R., Renaud, S., Rousseau, S., Salvatore, S., Schwartz, R. E., Spicer, J.  
550 D., Yost, C. C., Weber, A., Zuo, Y. & Egeblad, M. Targeting potential drivers of COVID-19:  
551 Neutrophil extracellular traps. *J Exp Med* **217**, doi:10.1084/jem.20200652 (2020).
- 552 29 Hidalgo, A., Chilvers, E. R., Summers, C. & Koenderman, L. The Neutrophil Life Cycle.  
553 *Trends Immunol* **40**, 584-597, doi:10.1016/j.it.2019.04.013 (2019).
- 554 30 Morrissey, S. M., Geller, A. E., Hu, X., Tieri, D., Cooke, E. A., Ding, C., Woeste, M., Zhange,  
555 H.-g., Cavallazi, R., Clifford, S. P., Chen, J., Kong, M., Watson, C. T., Huang, J. & Yan, J.  
556 Emergence of Low-density Inflammatory Neutrophils Correlates with Hypercoagulable State  
557 and Disease Severity in COVID-19 Patients. *Preprint at*  
558 <https://www.medrxiv.org/content/medrxiv/early/2020/05/26/2020.05.22.20106724.full.pdf>,  
559 2020.2005.2022.20106724, doi:10.1101/2020.05.22.20106724 (2020).
- 560 31 Aziz, M., Fatima, R. & Assaly, R. Elevated Interleukin-6 and Severe COVID-19: A Meta-  
561 Analysis. *J Med Virol*, doi:10.1002/jmv.25948 (2020).
- 562 32 Yang, Y., Shen, C., Li, J., Yuan, J., Wei, J., Huang, F., Wang, F., Li, G., Li, Y., Xing, L., Peng,  
563 L., Yang, M., Cao, M., Zheng, H., Wu, W., Zou, R., Li, D., Xu, Z., Wang, H., Zhang, M.,  
564 Zhang, Z., Gao, G. F., Jiang, C., Liu, L. & Liu, Y. Plasma IP-10 and MCP-3 levels are highly  
565 associated with disease severity and predict the progression of COVID-19. *J Allergy Clin*  
566 *Immunol*, doi:10.1016/j.jaci.2020.04.027 (2020).
- 567 33 Wen, W., Su, W., Tang, H., Le, W., Zhang, X., Zheng, Y., Liu, X., Xie, L., Li, J., Ye, J., Dong,  
568 L., Cui, X., Miao, Y., Wang, D., Dong, J., Xiao, C., Chen, W. & Wang, H. Immune cell profiling  
569 of COVID-19 patients in the recovery stage by single-cell sequencing. *Cell Discov* **6**, 31,  
570 doi:10.1038/s41421-020-0168-9 (2020).
- 571 34 Zhang, D., Guo, R., Lei, L., Liu, H., Wang, Y., Wang, Y., Dai, T., Zhang, T., Lai, Y., Wang, J.,  
572 Liu, Z., He, A., O'Dwyer, M. & Hu, J. COVID-19 infection induces readily detectable  
573 morphological and inflammation-related phenotypic changes in peripheral blood monocytes,  
574 the severity of which correlate with patient outcome. *Preprint at*  
575 <https://www.medrxiv.org/content/medrxiv/early/2020/03/26/2020.03.24.20042655.full.pdf>,  
576 2020.2003.2024.20042655, doi:10.1101/2020.03.24.20042655 (2020).
- 577 35 Zimmermann, M., Aguilera, F. B., Castellucci, M., Rossato, M., Costa, S., Lunardi, C., Ostuni,  
578 R., Girolomoni, G., Natoli, G., Bazzoni, F., Tamassia, N. & Cassatella, M. A. Chromatin  
579 remodelling and autocrine TNFalpha are required for optimal interleukin-6 expression in  
580 activated human neutrophils. *Nat Commun* **6**, 6061, doi:10.1038/ncomms7061 (2015).
- 581 36 Cervantes, J. L., Weirnerman, B., Basole, C. & Salazar, J. C. TLR8: the forgotten relative  
582 revindicated. *Cell Mol Immunol* **9**, 434-438, doi:10.1038/cmi.2012.38 (2012).
- 583 37 Linden, A., Laan, M. & Anderson, G. P. Neutrophils, interleukin-17A and lung disease. *Eur*  
584 *Respir J* **25**, 159-172, doi:10.1183/09031936.04.00032904 (2005).
- 585 38 Maggi, L., Santarlasci, V., Capone, M., Peired, A., Frosali, F., Crome, S. Q., Querci, V.,  
586 Fambrini, M., Liotta, F., Levings, M. K., Maggi, E., Cosmi, L., Romagnani, S. & Annunziato, F.  
587 CD161 is a marker of all human IL-17-producing T-cell subsets and is induced by RORC. *Eur*  
588 *J Immunol* **40**, 2174-2181, doi:10.1002/eji.200940257 (2010).
- 589 39 Pacha, O., Sallman, M. A. & Evans, S. E. COVID-19: a case for inhibiting IL-17? *Nat Rev*  
590 *Immunol*, doi:10.1038/s41577-020-0328-z (2020).
- 591 40 Megna, M., Napolitano, M. & Fabbrocini, G. May IL-17 have a role in COVID-19 infection?  
592 *Med Hypotheses* **140**, 109749, doi:10.1016/j.mehy.2020.109749 (2020).
- 593 41 Wu, D. & Yang, X. O. TH17 responses in cytokine storm of COVID-19: An emerging target of  
594 JAK2 inhibitor Fedratinib. *J Microbiol Immunol Infect*, doi:10.1016/j.jmii.2020.03.005 (2020).



- 595 42 Tanaka, Y., Morita, C. T., Tanaka, Y., Nieves, E., Brenner, M. B. & Bloom, B. R. Natural and  
596 synthetic non-peptide antigens recognized by human gamma delta T cells. *Nature* **375**, 155-  
597 158, doi:10.1038/375155a0 (1995).
- 598 43 Poupot, M. & Fournie, J. J. Non-peptide antigens activating human Vgamma9/Vdelta2 T  
599 lymphocytes. *Immunol Lett* **95**, 129-138, doi:10.1016/j.imlet.2004.06.013 (2004).
- 600 44 Laggner, U., Di Meglio, P., Perera, G. K., Hundhausen, C., Lacy, K. E., Ali, N., Smith, C. H.,  
601 Hayday, A. C., Nickoloff, B. J. & Nestle, F. O. Identification of a novel proinflammatory human  
602 skin-homing Vgamma9Vdelta2 T cell subset with a potential role in psoriasis. *J Immunol* **187**,  
603 2783-2793, doi:10.4049/jimmunol.1100804 (2011).
- 604 45 McCarthy, N. E., Hedin, C. R., Sanders, T. J., Amon, P., Hoti, I., Ayada, I., Baji, V., Giles, E.  
605 M., Wildemann, M., Bashir, Z., Whelan, K., Sanderson, I., Lindsay, J. O. & Stagg, A. J.  
606 Azathioprine therapy selectively ablates human Vdelta2(+) T cells in Crohn's disease. *J Clin*  
607 *Invest* **125**, 3215-3225, doi:10.1172/JCI80840 (2015).
- 608 46 Urboniene, D., Babusyte, A., Lotvall, J., Sakalauskas, R. & Sitkauskienė, B. Distribution of  
609 gammadelta and other T-lymphocyte subsets in patients with chronic obstructive pulmonary  
610 disease and asthma. *Respir Med* **107**, 413-423, doi:10.1016/j.rmed.2012.11.012 (2013).
- 611 47 Sant, S., Jenkins, M. R., Dash, P., Watson, K. A., Wang, Z., Pizzolla, A., Koutsakos, M.,  
612 Nguyen, T. H., Lappas, M., Crowe, J., Loudovaris, T., Mannering, S. I., Westall, G. P.,  
613 Kotsimbos, T. C., Cheng, A. C., Wakim, L., Doherty, P. C., Thomas, P. G., Loh, L. &  
614 Kedzierska, K. Human gammadelta T-cell receptor repertoire is shaped by influenza viruses,  
615 age and tissue compartmentalisation. *Clin Transl Immunology* **8**, e1079,  
616 doi:10.1002/cti2.1079 (2019).
- 617 48 Bonneville, M., O'Brien, R. L. & Born, W. K. Gammadelta T cell effector functions: a blend of  
618 innate programming and acquired plasticity. *Nat Rev Immunol* **10**, 467-478,  
619 doi:10.1038/nri2781 (2010).
- 620 49 Davey, M. S., Lin, C. Y., Roberts, G. W., Heuston, S., Brown, A. C., Chess, J. A., Toleman,  
621 M. A., Gahan, C. G., Hill, C., Parish, T., Williams, J. D., Davies, S. J., Johnson, D. W., Topley,  
622 N., Moser, B. & Eberl, M. Human neutrophil clearance of bacterial pathogens triggers anti-  
623 microbial gammadelta T cell responses in early infection. *PLoS Pathog* **7**, e1002040,  
624 doi:10.1371/journal.ppat.1002040 (2011).
- 625 50 Fazio, J., Kalyan, S., Wesch, D. & Kabelitz, D. Inhibition of human gammadelta T cell  
626 proliferation and effector functions by neutrophil serine proteases. *Scand J Immunol* **80**, 381-  
627 389, doi:10.1111/sji.12221 (2014).
- 628 51 Sabbione, F., Gabelloni, M. L., Ernst, G., Gori, M. S., Salamone, G., Oleastro, M., Trevani, A.,  
629 Geffner, J. & Jancic, C. C. Neutrophils suppress gammadelta T-cell function. *Eur J Immunol*  
630 **44**, 819-830, doi:10.1002/eji.201343664 (2014).
- 631 52 Fulop, T., Larbi, A., Dupuis, G., Le Page, A., Frost, E. H., Cohen, A. A., Witkowski, J. M. &  
632 Franceschi, C. Immunosenescence and Inflamm-Aging As Two Sides of the Same Coin:  
633 Friends or Foes? *Front Immunol* **8**, 1960, doi:10.3389/fimmu.2017.01960 (2017).
- 634 53 Xu, W., Lau, Z. W. X., Fulop, T. & Larbi, A. The Aging of gammadelta T Cells. *Cells* **9**,  
635 doi:10.3390/cells9051181 (2020).
- 636 54 Pung, R., Chiew, C. J., Young, B. E., Chin, S., Chen, M. I., Clapham, H. E., Cook, A. R.,  
637 Maurer-Stroh, S., Toh, M., Poh, C., Low, M., Lum, J., Koh, V. T. J., Mak, T. M., Cui, L., Lin,  
638 R., Heng, D., Leo, Y. S., Lye, D. C. & Lee, V. J. M. Investigation of three clusters of COVID-  
639 19 in Singapore: implications for surveillance and response measures. *Lancet* **395**, 1039-  
640 1046, doi:10.1016/s0140-6736(20)30528-6 (2020).
- 641 55 Darnell, M. E. & Taylor, D. R. Evaluation of inactivation methods for severe acute respiratory  
642 syndrome coronavirus in noncellular blood products. *Transfusion* **46**, 1770-1777,  
643 doi:10.1111/j.1537-2995.2006.00976.x (2006).
- 644 56 Chen, H., Lau, M. C., Wong, M. T., Newell, E. W., Poidinger, M. & Chen, J. Cytokit: A  
645 Bioconductor Package for an Integrated Mass Cytometry Data Analysis Pipeline. *PLoS*  
646 *Comput Biol* **12**, e1005112, doi:10.1371/journal.pcbi.1005112 (2016).
- 647

648

649 **Figure legends**

650 **Figure 1: SARS-CoV-2 infection induces a decrease in immune cells in**  
651 **peripheral blood.** (a) Schematic representation of flow cytometry workflow. (b)  
652 Heatmap representation of row z-score of mean absolute cell counts across the  
653 groups. Individual plots are shown in Supplementary Figure 1A. (c) UMAP clustering  
654 of CD45+ immune cells. (d) Heatmap representation of row z-score of monocyte  
655 activation markers mean geometric MFI (gMFI) across the groups. (e) Heatmap  
656 representation of row z-score of neutrophil activation markers mean geometric MFI  
657 (gMFI) across the groups. (f) Absolute neutrophil counts. (g) Representative plot of  
658 mature and immature neutrophil gating strategy in healthy control or acute COVID-  
659 19 patient. (h) Mature (CD10+) and Immature (CD10-) Neutrophil Abs counts.  
660 Absolute counts were analysed by Kruskal-Wallis using Dunn correction for multiple  
661 comparison, gMFI was analysed by Brown-Forsythe and Welch ANOVA using  
662 Dunnett T3 correction for multiple comparison. For heatmaps, stars shown in acute  
663 column represent healthy vs acute comparison. Stars shown in recovered column  
664 represent acute vs recovered comparison. ns non-significant. \* $p < 0.05$ , \*\* $p < 0.01$ ,  
665 \*\*\* $p < 0.001$

666

667 **Figure 2: SARS-CoV-2 infection induces general lymphopenia and CD8, VD1**  
668 **and VD2 activation.** (a) Absolute counts of T-cell compartments in healthy donors,  
669 acute and recovered COVID-19 patient. (b) UMAP clustering of CD3+ cells. (c) left  
670 panel: CD45RA and CD27 gating strategy; right panel: heatmap representation of  
671 mean frequencies of T-cell differentiation across the groups, individual plots given in  
672 Supplementary Figure 2. (d) Representative histogram of CD38 expression in CD4,  
673 CD8, VD1 and VD2 T-cells. (e) Changes in CD38 gMFI in naïve, CM, EM and

674 TEMRA for CD8, CD4, VD1 and VD2 T-cells. Absolute counts were analysed by  
675 Kruskal-Wallis using Dunn correction for multiple comparison, gMFI was analysed by  
676 Brown-Forsythe and Welch ANOVA using Dunnett T3 correction for multiple  
677 comparison. For heatmaps, stars shown in acute column represent healthy vs acute  
678 comparison. Stars shown in recovered column represent acute vs recovered  
679 comparison. \* $p < 0.05$ , \*\* $p < 0.01$ , \*\*\* $p < 0.001$

680

681 **Figure 3: Patient symptoms are reflected in immune cell variations.** (a)  
682 Schematic representation of clinical symptoms in the patient cohort. (b) Absolute  
683 counts of T-cells across the severity (c) Absolute counts of antigen presenting cells  
684 across the severity. (d) gMFI of activation markers on antigen presenting cells. (e)  
685 Absolute counts and frequency in neutrophil compartments. Absolute counts were  
686 analysed by Kruskal-Wallis with Dunn multiple testing correction, gMFI was analysed  
687 by Brown-Forsythe and Welch ANOVA with Dunnett T3 multiple testing correction.  
688 \* $p < 0.05$ , \*\* $p < 0.01$ , \*\*\* $p < 0.001$

689

690 **Figure 4: Immature neutrophils correlate with several analytes in paired patient**  
691 **plasma.** (a) Spearman correlations between total neutrophils or immature  
692 neutrophils and plasma analytes. Red cross represents non-significant correlations.  
693 (b) Individual plots of Spearman correlations between immature neutrophil counts  
694 and IL-6 and IP-10. Line was drawn using simple linear regression.

695

696 **Figure 5: Immature neutrophil to VD2 T-cell ratio is an early prognosis marker**  
697 **for pneumonia and hypoxia symptoms.** (a) ROC curve analysis comparison was  
698 performed for pneumonia and hypoxia symptoms between absolute counts of total

699 neutrophils to CD8 T-cell ratio, total neutrophils to VD2 T-cell, immature neutrophils  
700 to CD8 T-cell ratio, and immature neutrophils to VD2 T-cell ratio. (b) Similar analysis  
701 was performed on a subset of 24 early samples taken up to 7 days pio with a median  
702 of 3 days pio. ROC curve was analysed using Wilson/Brown method. 95%  
703 confidence interval and standard error for panel B are given in Table 1.

704 **Table 1: ROC curve analysis for neutrophils to T-cell ratios in patients with**  
 705 **pneumonia or hypoxia compared to those without as presented in Figure 5b.**

| <u>Variable</u>                       | <u>Pneumonia</u>              |           |         | <u>Hypoxia</u>       |           |         |
|---------------------------------------|-------------------------------|-----------|---------|----------------------|-----------|---------|
|                                       | AUC<br>(95% CI)               | Std.Error | p-value | AUC<br>(95% CI)      | Std.Error | p-value |
| Total neutrophils /<br>CD8 T-cells    | 0.7143<br>(0.4909-<br>0.9377) | 0.1140    | 0.0790  | 0.8319<br>(.6526-1)  | 0.09149   | 0.0121  |
| Total neutrophils /<br>VD2 T-cells    | 0.8643<br>(0.7135-1)          | 0.07694   | 0.0028  | 0.8824<br>(.07239-1) | 0.08083   | 0.0039  |
| Immature neutrophils /<br>CD8 T-cells | 0.7929<br>(0.5884-<br>0.9973) | 0.1043    | 0.0164  | 0.8403<br>(0.6079-1) | 0.1186    | 0.0101  |
| Immature neutrophils /<br>VD2 T-cells | 0.9071<br>(0.7754-1)          | 0.06723   | 0.0008  | 0.8908<br>(0.7160-1) | 0.08915   | 0.0031  |

ROC analysis was performed on COVID-19 patients between 2 to 7 days pio (24 patients, median 3 days pio). ROC curve was built by plotting true positive rate (sensitivity) against false positive rate (100%- sensitivity) and AUC was calculated from the plot. ROC, receiver operating characteristic ; AUC, area under curve ; CI, confidence interval ; Std.Error, standard error.

706

# Figure 1

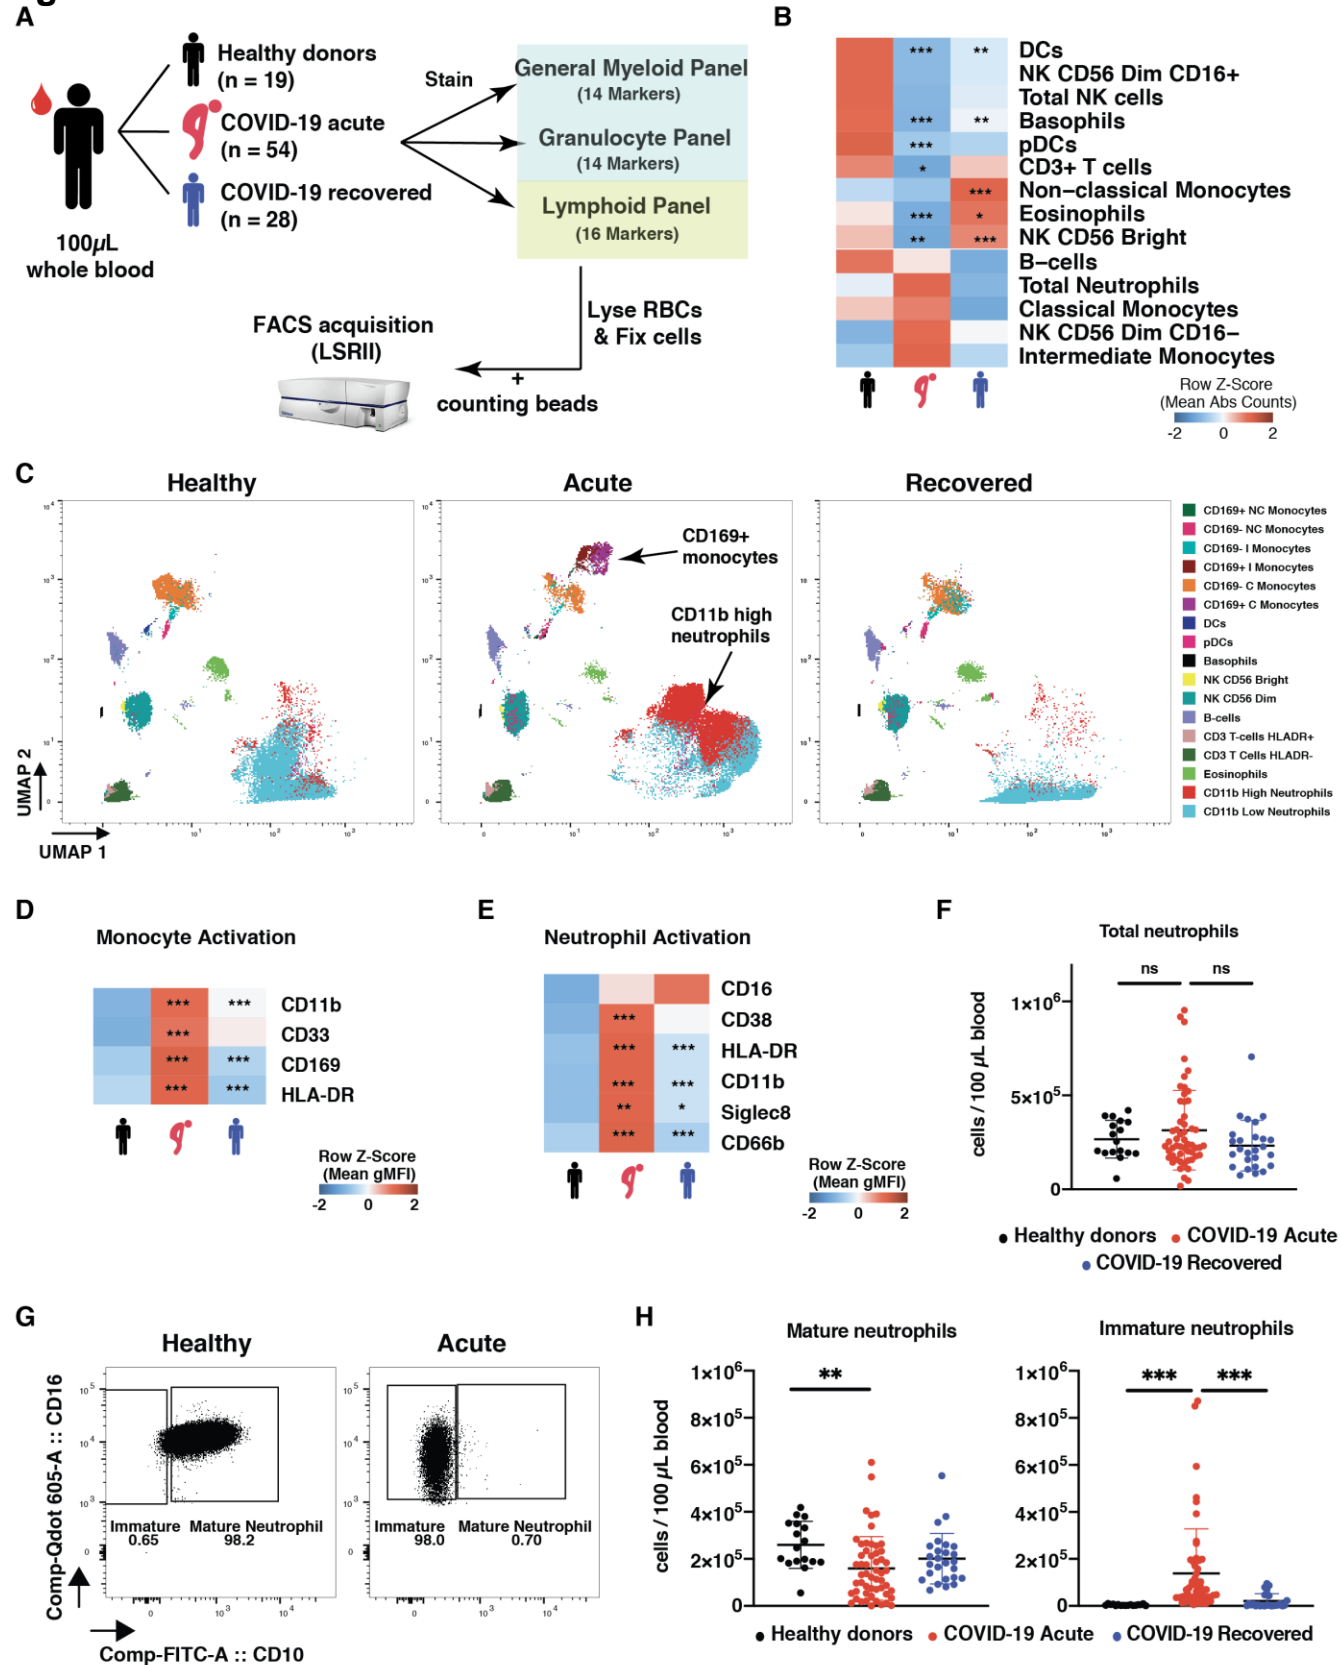

**Figure 1: SARS-CoV-2 infection induces a decrease in immune cells in peripheral blood.** (a) Schematic representation of flow cytometry workflow. (b) Heatmap representation of row z-score of mean absolute cell counts across the groups. Individual plots are shown in Supplementary Figure 1A. (c) UMAP clustering of CD45+ immune cells. (d) Heatmap representation of row z-score of monocyte activation markers mean geometric MFI (gMFI) across the groups. (e) Heatmap representation of row z-score of neutrophil activation markers mean geometric MFI (gMFI) across the groups. (f) Absolute neutrophil counts. (g) Representative plot of mature and immature neutrophil gating strategy in healthy control or acute COVID-19 patient. (h) Mature (CD10+) and Immature (CD10-) Neutrophil Abs counts. Absolute counts were analysed by Kruskal-Wallis using Dunn correction for multiple comparison, gMFI was analysed by Brown-Forsythe and Welch ANOVA using Dunnett T3 correction for multiple comparison. For heatmaps, stars shown in acute column represent healthy vs acute comparison. Stars shown in recovered column represent acute vs recovered comparison. ns non-significant. \*p<0.05, \*\*p<0.01, \*\*\*p<0.001

**Carissimo\_Xu\_Kwok et al. 2020**

# Figure 2

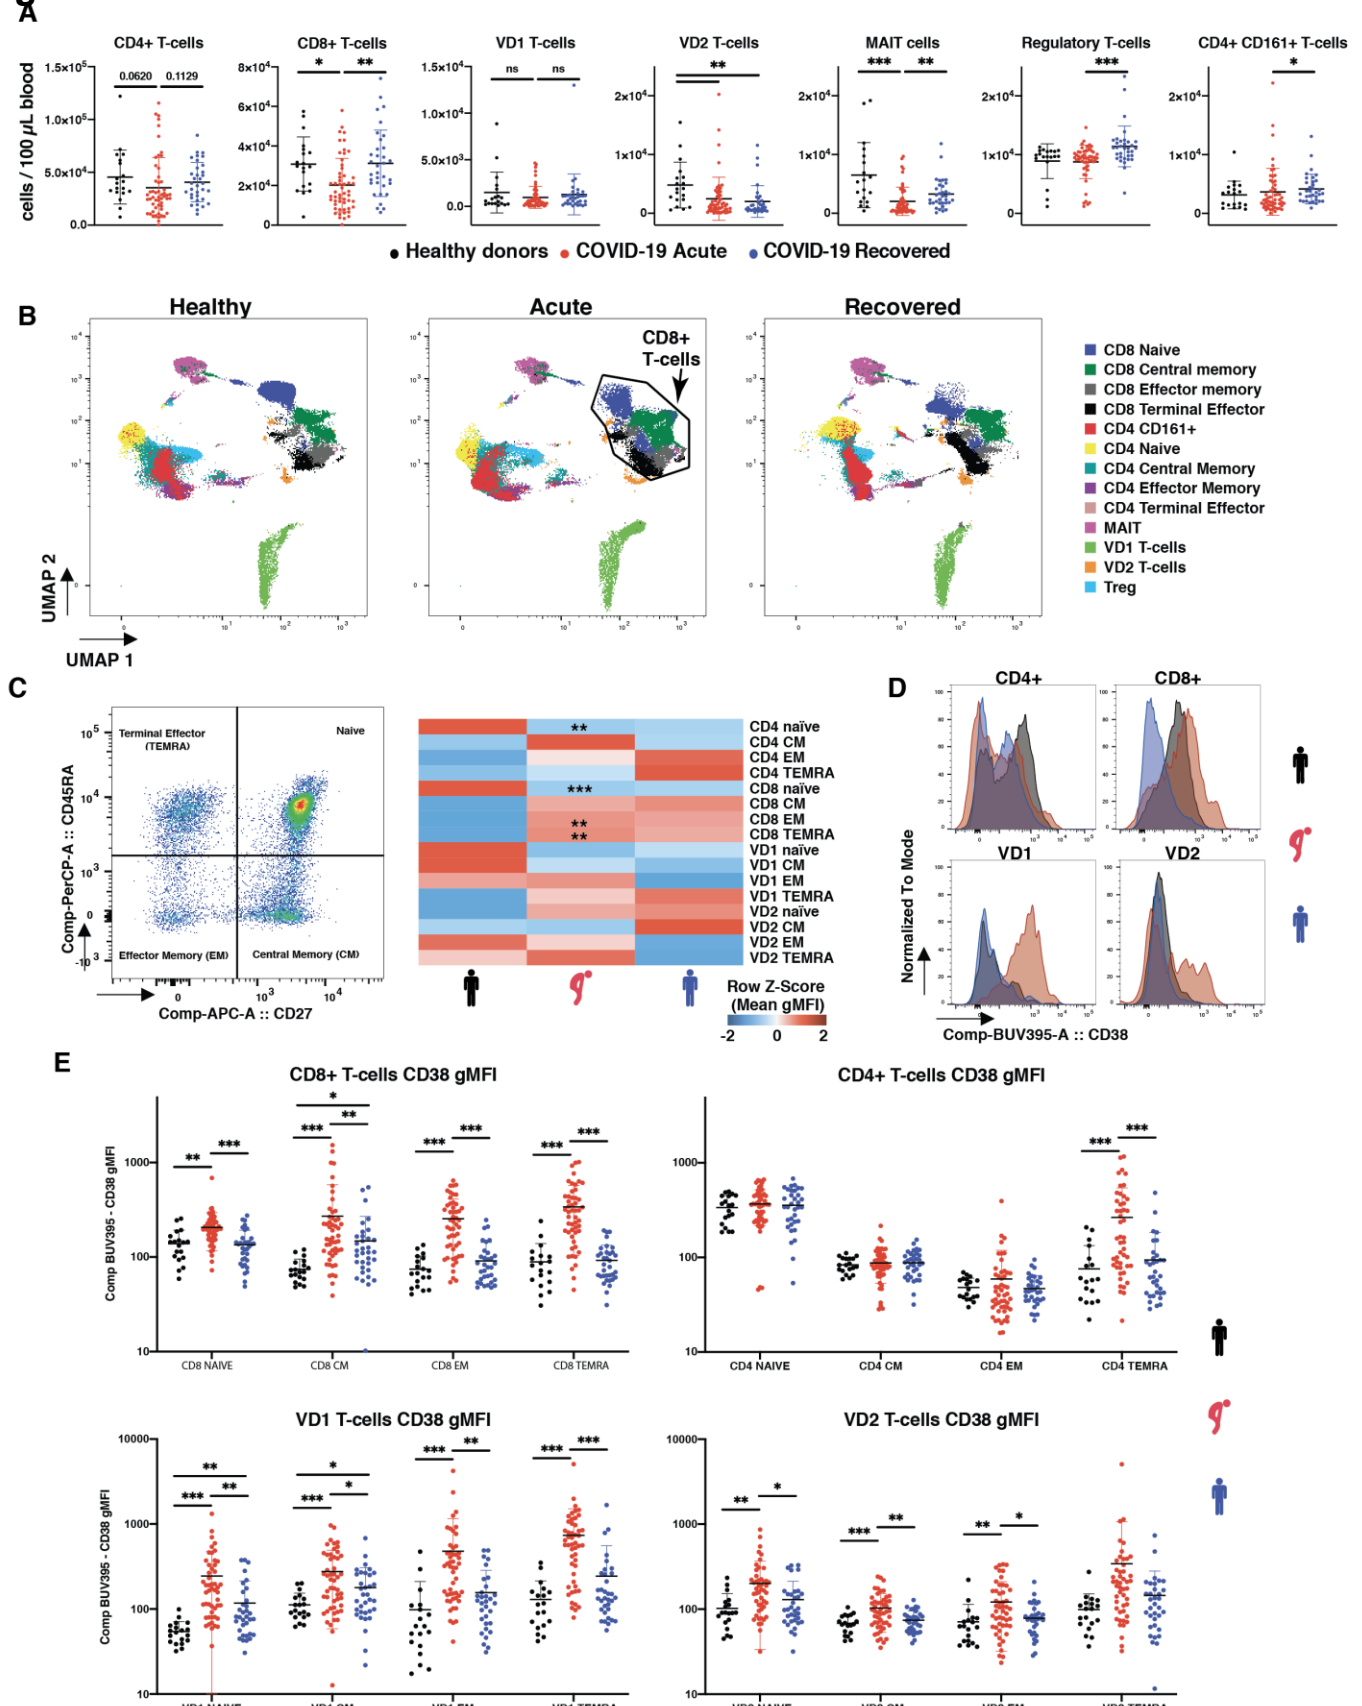

**Figure 2: SARS-CoV-2 infection induces general lymphopenia and CD8, VD1 and VD2 activation.** (a) Absolute counts of T-cell compartments in healthy donors, acute and recovered COVID-19 patient. (b) UMAP clustering of CD3+ cells. (c) left panel: CD45RA and CD27 gating strategy; right panel: heatmap representation of mean frequencies of T-cell differentiation across the groups, individual plots given in Supplementary Figure 2. (d) Representative histogram of CD38 expression in CD4, CD8, VD1 and VD2 T-cells. (e) Changes in CD38 gMFI in naive, CM, EM and TEMRA for CD8, CD4, VD1 and VD2 T-cells. Absolute counts were analysed by Kruskal-Wallis using Dunn correction for multiple comparison, gMFI was analysed by Brown-Forsythe and Welch ANOVA using Dunnett T3 correction for multiple comparison. For heatmaps, stars shown in acute column represent healthy vs acute comparison. Stars shown in recovered column represent acute vs recovered comparison. \* $p < 0.05$ , \*\* $p < 0.01$ , \*\*\* $p < 0.001$



# Figure 3

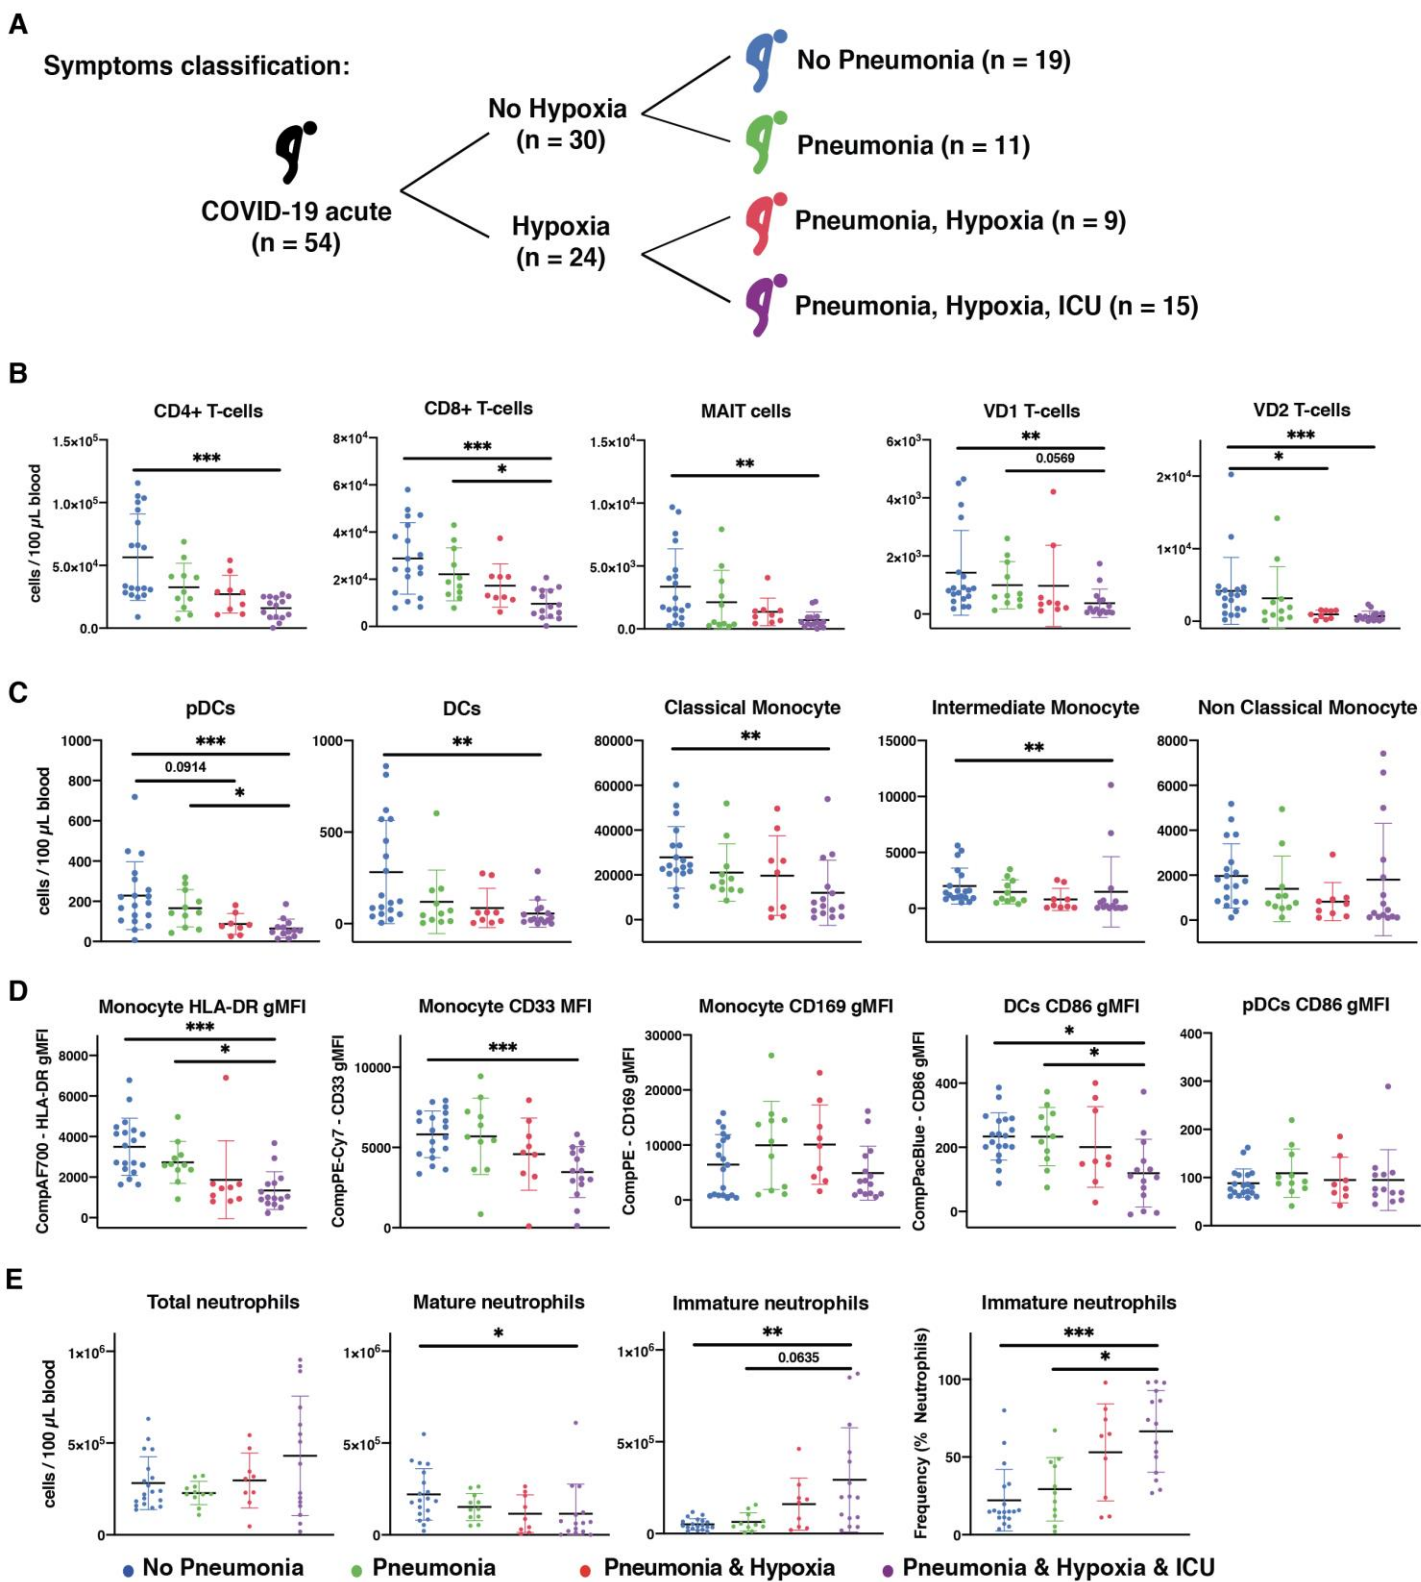

**Figure 3: Patient symptoms are reflected in immune cell variations.** (a) Schematic representation of clinical symptoms in the patient cohort. (b) Absolute counts of T-cells across the severity (c) Absolute counts of antigen presenting cells across the severity. (d) gMFI of activation markers on antigen presenting cells. (e) Absolute counts and frequency in neutrophil compartments. Absolute counts were analysed by Kruskal-Wallis with Dunn multiple testing correction, gMFI was analysed by Brown-Forsythe and Welch ANOVA with Dunnett T3 multiple testing correction. \* $p < 0.05$ , \*\* $p < 0.01$ , \*\*\* $p < 0.001$



# Figure 4

A

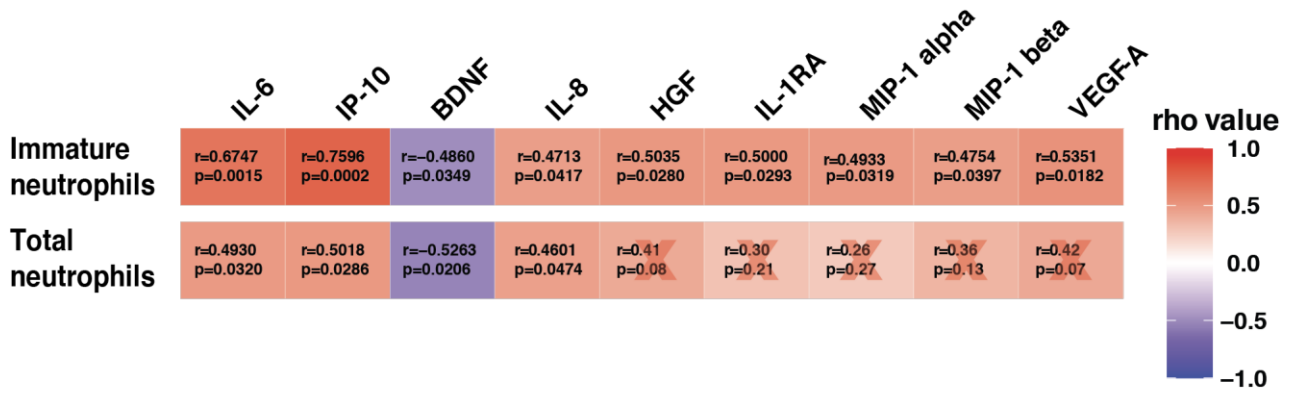

B

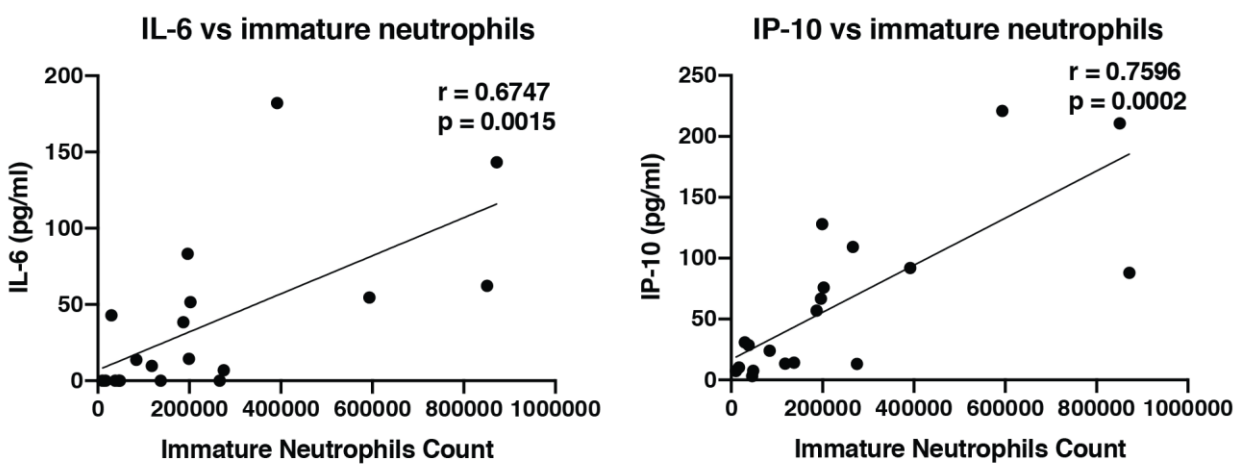

**Figure 4: Immature neutrophils correlate with several analytes in paired patient plasma.** (a) Spearman correlations between total neutrophils or immature neutrophils and plasma analytes. Red cross represents non-significant correlations. (b) Individual plots of Spearman correlations between immature neutrophil counts and IL-6 and IP-10. Line was drawn using simple linear regression.

# Figure 5

## A No pneumonia vs pneumonia - all samples

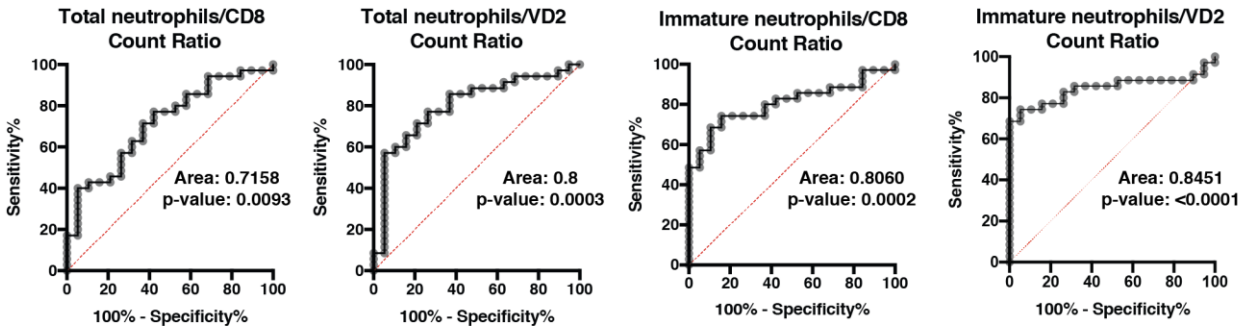

## No hypoxia vs hypoxia - all samples

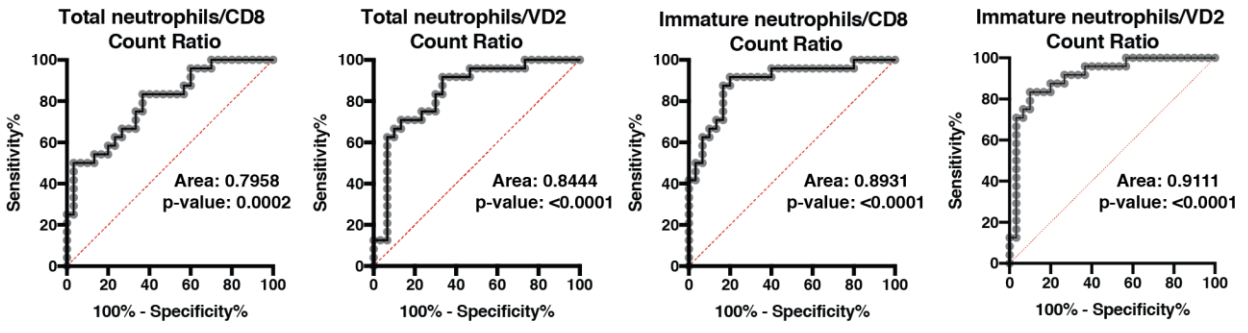

## B No pneumonia vs pneumonia - early sampling median 3 days pio

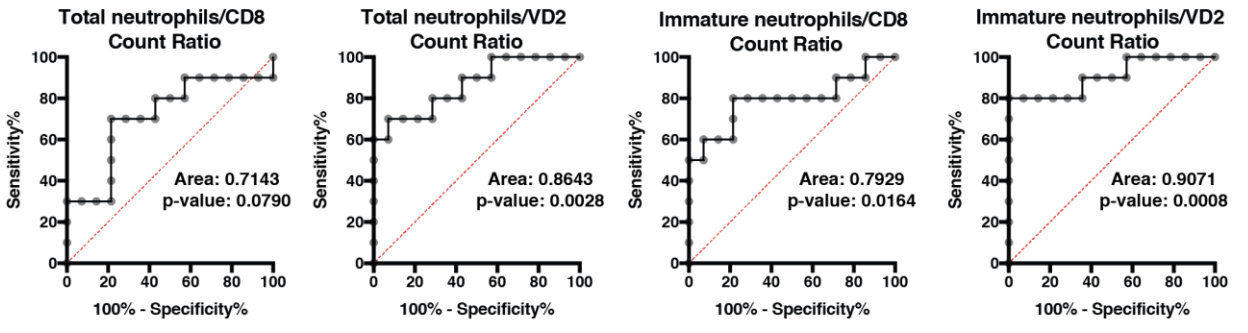

## No hypoxia vs hypoxia - early sampling median 3 days pio

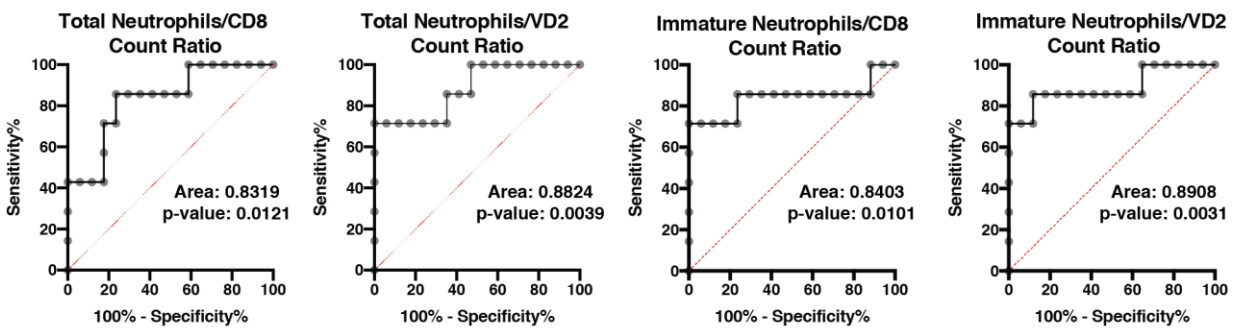

**Figure 5: Immature neutrophil to VD2 T-cell ratio is an early prognosis marker for pneumonia and hypoxia symptoms.** (a) ROC curve analysis comparison was performed for pneumonia and hypoxia symptoms between absolute counts of total neutrophils to CD8 T-cell ratio, total neutrophils to VD2 T-cell, immature neutrophils to CD8 T-cell ratio, and immature neutrophils to VD2 T-cell ratio. (b) Similar analysis was performed on a subset of 24 early samples taken up to 7 days pio with a median of 3 days pio. ROC curve was analysed using Wilson/Brown method. 95% confidence interval and standard error for panel B are given in Table 1.
